# Supplementary material
Source: Research Square preprint supplement (doi:10.21203/rs.3.rs-9962661/v1)
Supplement: Supplementary file 1 [file 60935c9dfcf4e78f106f923a.docx]

**Supplemental results**

**Table S1.** Factors associated with being diagnosed with cirrhosis prior to HCC diagnosis among those with cirrhosis and HBV-HCC (N=141)

|  | Crude HR (95% CI) | P-value | Adjusted HR (95% CI) | P-value |
| --- | --- | --- | --- | --- |
| Referral source:  Liver specialist | 7.64 (3.52-16.56) | <0.001 | 9.23 (3.82-22.32) | <0.001 |
| Age category  36-45 years  46-55 years  56-65 years  66-75 years  >75 years | *ref*  0.47 (0.08-2.81)  0.49 (0.09-2.68)  0.46 (0.08-2.57)  0.46 (0.07-2.89) | 0.405  0.412  0.375  0.406 |  |  |
| Male | 1.78 (0.64-4.93) | 0.267 |  |  |
| Non-English speaking background | 0.54 (0.27-1.08) | 0.081 | 0.42 (0.18-0.98) | 0.045 |
| ECOG* | 0.59 (0.36-0.97) | 0.036 | 0.98 (0.54-1.75) | 0.939 |
| Mental health condition | 1.10 (0.34-3.56) | 0.870 |  |  |
| Smoking status | 1.30 (0.51-3.30) | 0.587 |  |  |
| Hazardous or harmful alcohol use | 0.95 (0.38-2.40) | 0.912 |  |  |
| IVDU (Y/N) | 3.57 (0.41-31.43) | 0.251 |  |  |
| Family history HCC | 0.67 (0.13-3.43) | 0.627 |  |  |

*Treated as an ordinal continuous variable, due to a positive test for linear trend.

*ECOG, Eastern Cooperative Oncology Group score; IVDU, intravenous drug use*

**Table S2**. Factors associated with being enrolled in HCC surveillance among people with HBV-HCC who were eligible for HCC surveillance (N=188)

|  | Crude HR (95% CI) | P-value | Adjusted HR (95% CI) | P-value |
| --- | --- | --- | --- | --- |
| Referral source:  Liver specialist | 5.21 (2.82-9.62) | <0.001 | 4.01 (2.10-7.69) | <0.001 |
| Age category  36-45 years  46-55 years  56-65 years  66-75 years  >75 years | *ref*  0.41 (0.11-1.49)  2.24 (0.37-4.09)  0.56 (0.17-1.89)  0.64 (0.17-2.41) | 0.177  0.726  0.353  0.513 |  |  |
| Male | 2.49 (0.93-6.67) | 0.068 |  |  |
| Non-English speaking background | 0.58 (0.32-0.99) | 0.050 | 0.60 (0.32-1.14) | 0.119 |
| ECOG* | 0.42 (0.25-0.71) | 0.001 | 0.55 (0.31-0.97) | 0.039 |
| Mental health | 1.38 (-.48-3.96) | 0.552 |  |  |
| Smoking status | 1.46 (0.67-3.15) | 0.338 |  |  |
| Alcohol misuse | 0.50 (0.20-1.22) | 0.127 |  |  |
| IVDU | 1.13 (0.22-5.77) | 0.879 |  |  |
| Family history HCC | 0.77 (0.26-2.24) | 0.627 |  |  |

*Treated as an ordinal continuous variable, due to a positive test for linear trend.

*ECOG, Eastern Cooperative Oncology Group score; IVDU, intravenous drug use*

**Table S3.** Factors associated with being on HBV treatment (N=219)

|  | Crude HR (95% CI) | P-value | Adjusted HR (95% CI) | P-value |
| --- | --- | --- | --- | --- |
| Referral source:  Liver specialist | 8.32 (4.15-16.70) | <0.001 | 6.25 (2.98-13.11) | <0.001 |
| Age category* | 0.91 (0.70-1.19) | 0.493 |  |  |
| Male | 1.06 (0.43-2.63) | 0.901 |  |  |
| Non-English speaking background | 1.28 (0.71-2.34) | 0.408 |  |  |
| ECOG* | 0.34 (0.19-0.63) | <0.001 | 0.53 (0.78-1.02) | 0.058 |
| Mental health | 0.60 (0.21-1.73) | 0.344 |  |  |
| Smoking status | 0.66 (0.29-1.15) | 0328 |  |  |
| Hazardous or harmful alcohol use | 0.21 (0.08-0.59) | 0.003 | 0.35 (0.11-1.09) | 0.071 |
| IVDU | 0.50 (0.09-2.80) | 0.431 |  |  |
| Family history HCC | 2.20 (0.64-7.59) | 0.212 |  |  |

*Treated as an ordinal continuous variable, due to a positive test for linear trend.

**Table S4** Factors associated with HCC diagnosis at early BCLC stage (0/A) (N=202)

|  | Crude HR | P-value | Adjusted HR | P-value |
| --- | --- | --- | --- | --- |
| Referral source:  Liver specialist | 3.69 (2.08-6.53) | <0.001 | 2.57 (1.33-4.95) | 0.005 |
| Age category* | 0.75 (0.58-0.96) | 0.020 |  |  |
| Male | 1.70 (0.72-3.98) | 0.221 |  |  |
| Non-English speaking background | 0.96 (0.56-1.66) | 0.895 |  |  |
| ECOG* | 0.20 (0.11-0.36) | <0.001 | 0.25 (0.13-0.45) | <0.001 |
| Mental health | 1.62 (0.54-4.84) | 0.387 |  |  |
| Smoking status | 2.11 (0.93-4.79) | 0.075 |  |  |
| Hazardous or harmful alcohol use | 0.35 (0.15-0.80) | 0.013 | 0.39 (0.15-1.02) | 0.054 |
| Enrolled in surveillance | 6.98 (3.75-13.02) | <0.001 |  |  |
| HBV treatment | 5.77 (3.06-10.87) | <0.001 |  |  |

* Treated as an ordinal continuous variable, due to a positive test for linear trend.

**Figure S1:** Comparison of overall survival from diagnosis in people with hepatitis B related HCC who were under the care of a hepatologist compared to those who were not at the time of diagnosis (logrank p<0.001).

**Figure S2:** Comparison of overall survival from diagnosis in people with hepatitis B related HCC who were enrolled in HCC surveillance compared to those who were not at the time of diagnosis (logrank p=0.001).

**Figure S3.** Overall survival among people with hepatitis B related HCC who were on HBV treatment with nucleos(t)ide analogues at the time of HCC diagnosis compared to those who were not (Logrank p<0.001)
